# Supplementary material
Source: PubMed Central journal article supplement (PMC7115287)
Supplement: mmc1.pdf [file mmc1.pdf]

## Knowledge of MERS

**Instruction :** The following are questions that will ask about your knowledge level on MERS. They are only intended to ask you about basic knowledge. Thus, it will not be scored. Please do not refer to information provided via internet search or any other resources. Please check ✓ next to the answer of your choice.

**1. How would you rate your knowledge level on MERS disease?**

- ① Very poor
- ② Poor
- ③ Average
- ④ Good
- ⑤ Very good

**2. Which of the following is correct about the definition of MERS?**

- MERS is a respiratory disease caused by corona virus infection.
- Displayed symptoms usually include respiratory symptoms accompanied by fever, but MERS is not contagious.
- MERS can progress to a severe illness, but may not lead to death.
- Don't know

**3. Which of the following is correct about transmission route of MERS?**

- A clear transmission route of MERS is known.
- MERS is transmitted by close contact with people.
- MERS is a foodborne illness.
- Don't know.

**4. Which of the following is NOT correct about “close contact” of MERS?**

- “Close contact” involves a direct contact with patients’ respiratory secretions.
- “Close contact” involves being in the same room or doctor’s office, treatment room or hospital room with a MERS patient.
- Relatives and healthcare workers are excluded from the category of close contact.
- Don’t know.

**5. Which of the following is correct about symptom of MERS?**

- Typical symptoms of MERS are high fever, coughing and shortness of breath.
- MERS is not related to other underlying diseases.
- There are no cases without symptom.
- Don’t know.

**6. Which of the following is correct about the incubation period of MERS?**

- Symptoms of MERS appear without an incubation period.
- During an incubation period, symptoms of MERS don’t appear, but MERS can be transmitted.
- An incubation period is between 2 to 14 days, with the average of 5 days.
- Don’t know.

**7. Which of the following explanations is NOT correct about the characteristics of MERS?**

- There is no scientific evidence yet that elderly people, pregnant women or children are more susceptible to MERS.
- It is known that women who are in their 50s and suffering from other diseases fall ill to MERS more than anyone else.
- There is no evidence yet about community transmission.
- Don’t know.

**8. Which one is incorrect about self-isolation of MERS?**

- Self-isolation means restricting a possible patient from going out of the house.
- If someone comes into a close contact with a MERS patient, she/he will be subject to self-isolation for 5 days, the average incubation period of the virus.
- If anyone rejects self-isolation, she/he will be fined in pursuant to the Infectious Disease Control and Prevention Act.
- Don't know.

**9. Which one is correct about treatment or vaccine of MERS?**

- There is a sure treatment for MERS.
- Currently, there is neither a vaccine nor a sure treatment for MERS.
- Currently, there isn't a sure treatment for MERS, but there is a vaccine.
- Don't know.

**Risk Perception on MERS**

**Instruction : Please check the answers depending on how much you agree with the statements below.**

|   |                                                                                            | Strongly Disagree | Disagree | Neutral | Agree | Strongly Agree |
|---|--------------------------------------------------------------------------------------------|-------------------|----------|---------|-------|----------------|
| 1 | I think that I will contract MERS if I come into contact with a MERS patient.              | 1                 | 2        | 3       | 4     | 5              |
| 2 | I think that I might contract MERS even if I do not come into contact with a MERS patient. | 1                 | 2        | 3       | 4     | 5              |
| 3 | My health will be severely damaged if I contract MERS.                                     | 1                 | 2        | 3       | 4     | 5              |
| 4 | I think MERS is more severe than any other respiratory diseases.                           | 1                 | 2        | 3       | 4     | 5              |
| 5 | Even if I fall ill with another disease, I will not go to hospital because of MERS.        | 1                 | 2        | 3       | 4     | 5              |
| 6 | MERS will inflict serious damage to my community.                                          | 1                 | 2        | 3       | 4     | 5              |
| 7 | MERS may spread in Korea again someday.                                                    | 1                 | 2        | 3       | 4     | 5              |

## Preventive Behaviors against MERS

**Instruction : Please answer 'Yes' to the preventive measures against MERS you practice.**

1. If possible, I did not leave home.  
 Yes                       No
2. I washed my hands with water and soap before and after I left home.  
 Yes                       No
3. I didn't touch my eyes, nose, and/or mouth with hands I had not washed.  
 Yes                       No
4. I avoided contact with people who had fever or respiratory symptoms.  
 Yes                       No
5. I washed my hands with hand sanitizers when I was outside.  
 Yes                       No
6. I wore a mask when I went outside.  
 Yes                       No
7. I avoided crowded places.  
 Yes                       No
8. I went to hospital much less.  
 Yes                       No
9. I avoided using public transportation.  
 Yes                       No
10. I ate food that would strengthen my immune system.  
 Yes                       No
11. I exercised to strengthen my immune system.  
 Yes                       No

## Governmental Policy and Social Reliability

The following section is based on the Korean General Social Survey (KGSS) conducted in 2012 by Sungkyunkwan University Survey Research Center. The original survey is composed of 120 questions, and we selected questions such as #4, #16, #17 in order to examine our study interest for this research.

**Instructions : Please check √ in the box next to the answer.**

**<Attention>: Social trust was measured using word 'Social Reliability' in the survey to emphasize the role of society and government and may change to 'Social Trust' as it is.**

1. For the following social structures in Korea, please rate how reliable you feel they are.

①: very unreliable ②: somewhat unreliable ③: neutral ④: somewhat reliable ⑤: very reliable

①                      ②                      ③                      ④                      ⑤

|                                 |  |  |  |  |  |
|---------------------------------|--|--|--|--|--|
| 1) Newspaper companies          |  |  |  |  |  |
| 2) TV broadcasting firms        |  |  |  |  |  |
| 3) Medical field                |  |  |  |  |  |
| 4) Central government agencies  |  |  |  |  |  |
| 5) Local autonomous governments |  |  |  |  |  |
| 6) National assembly            |  |  |  |  |  |
| 7) The Blue House               |  |  |  |  |  |
| 8) Citizen campaign groups      |  |  |  |  |  |

2. How reliable do you think our society is?

- ① Very unreliable
- ② Somewhat unreliable
- ③ Neutral
- ④ Somewhat reliable
- ⑤ Very reliable

3. Overall, how much are you aware of public health policies in Korea?

- ① Not at all
- ② Little bit aware of
- ③ Neutral
- ④ Somewhat aware of
- ⑤ Highly aware of

4. Overall, how reliable do you think current public health policies are in Korea?

- ① Very unreliable
- ② Somewhat unreliable
- ③ Neutral
- ④ Somewhat reliable
- ⑤ Very reliable

5. If you foresee future public health policies, do you anticipate that it will get better or get worse in comparison to present?
- ① Much worse
  - ② Somewhat worse
  - ③ Stay the same
  - ④ Somewhat better
  - ⑤ Much better

### Particular Situations relating to MERS

**Instructions : Please check ✓ in the box next to the answer of your choice.**

1. Do you think you usually try to help others by yourself?
- ① Strongly agree ② Agree ③ Disagree ④ Strongly disagree
2. Do you think you could sacrifice yourself when a national-wide disaster or crisis occurs?
- ① Strongly agree ② Agree ③ Disagree ④ Strongly disagree
3. Local governments inform the public the pathway of MERS moving route of infectees and the list of hospitals that has MERS patients so that people can report themselves when they think they are exposed to MERS infection threat. It is known that from ① to ④ below, the infection threat is getting low. In what condition would you report yourself?
- ① You had a close contact to an infectee.
  - ② You had a conversation with an infectee or visited emergency room that has infectee. (including the case ①)
  - ③ You might have stayed with an infectee indoors or taken the same public transportation in the same time.(including the case ①,②)
  - ④ You might have met an infected outdoors (including all the cases above)

**In the following section, the questions describe some given situations concerning the MERS outbreak in Korea. (These are only hypothetical situations, NOT real. Please choose an answer which corresponds to your thought.)**

**<Attention>: The term of Self-isolation was used generally when the MERS outbreak was spreading out in South Korea. Therefore, it may be considered as same meaning with 'Self-quarantine.'**

4. How would you react if you are suspected of being a MERS carrier and are recommended to be in self-isolation? (Including no entering of public places, no public transportation, no departure to other countries)
- ① I will accept self-isolation cooperatively prior to my personal tasks.

(Go to 4-1)

- ② I will accept self-isolation but my personal tasks are more important.

(Go to 4-2)

4-1. For what reasons would you accept self-isolation cooperatively prior to personal tasks?

- ① I don't want anyone else to suffer because of me
- ② To prevent spreading an epidemic
- ③ Others are more important than myself
- ④ Other ( )

4-2. For what reasons are your personal tasks more important than cooperation for self-isolation?

- ① I don't want to suffer because of others
- ② I don't care about spreading an epidemic
- ③ To take care of myself more than others
- ④ Other ( )

5. How do you usually react when an emergency situation or crisis arises?

- ① Overreact
- ② Do the least to handle the situation
- ③ Don't mind them
- ④ Don't know

6. How would you react if you realize your relatives or children of your family are in the same class with children of someone suspected (or confirmed) of having MERS? (Including school and extracurricular activities (EA))

- ① Don't allow my relatives or children of my family to attend school (or EA)

(Go to 6-1)

- ② Allow my relatives or children of my family to attend school (or EA) as usual

(Go to 6-2)

6-1. (If you will not allow attending) For what reason would you not allow?

- ① Because of worries about hazard to my relatives or children of my family.
- ② Because of worries about damages to me.
- ③ Because of worries about spreading this infectious disease to the public



④ Other ( )

6-2. (If you will allow attending as usual) For what reason would you allow?

- ① Because children of suspected (or confirmed) will not be hazardous to my relatives or children of my family.
- ② Because of worries about unequal opportunity for my relatives or children of my family
- ③ I don't think there would be any chance of spreading this infectious disease to the public because of this
- ④ Other ( )

7. How would you react if you realize my relatives or children of my family are in same class with children of medical staffs concerning MERS hospitals? (Including School, Extracurricular Activities)

- ① I think children of medical staffs concerning MERS are not allowed to attend school (or EA)

(Go to 7-1)

- ② I think children of suspected are allowed to attend school (or EA) as usual

(Go to 7-2)

7-1. (If you think them not allow attending) For what reason would you not allow?

- ① Because of worries about damage to my children
- ② Because of worries about damages to people around them
- ③ Because of worries about spreading this infectious disease to the public
- ④ Other ( )

7-2. (If you think them allow attending as usual) For what reason would you allow?

- ① Because children of medical staffs concerning MERS will not be hazardous to my children and near people
- ② Because of worries about unequal opportunity for children of medical staffs concerning MERS
- ③ I don't think there would be any chance of spreading this infectious disease to the public because of this
- ④ Other ( )

**Socioeconomic Information**

Instructions : Please check ✓ in the box next to the answer of your choice or write in the  provided as the case may be.

**Economic state  
of Household  
(Monthly Wage  
in Won)**

- Less than 1 million
- 1 – less than 2 million
- 2 – less than 3 million
- 3 – less than 4 million
- 4 – less than 5 million
- 5 million or more

**Residence**

- Apartment
- Single-Unit House
- Multi-Unit House
- Accommodation
- Studio
- Boarding House
- Dormitory

Other

---

Thank you for answering this questionnaire.

## MERS 설문 문항

설명 : 각 문항의 선택지에 해당되는 부분에 √로 표시해주시시오. 에는 자세한 세부사항에 대해 적어주시시오.

### 기본 정보

|    |    |                          |    |          |                          |
|----|----|--------------------------|----|----------|--------------------------|
| 성별 | 남성 | <input type="checkbox"/> | 연령 | 18-20    | <input type="checkbox"/> |
|    |    |                          |    | 21-23    | <input type="checkbox"/> |
|    | 여성 | <input type="checkbox"/> |    | 24-26    | <input type="checkbox"/> |
|    |    |                          |    | 27-29    | <input type="checkbox"/> |
|    |    |                          |    | Above 30 | <input type="checkbox"/> |

|    |             |                          |                                    |
|----|-------------|--------------------------|------------------------------------|
| 국적 | 대한민국        | <input type="checkbox"/> | 보다 자세한 국적을 선택해 주십시오:<br>항목을 선택하세요. |
|    | Asia        | <input type="checkbox"/> |                                    |
|    | America     | <input type="checkbox"/> |                                    |
|    | Europe      | <input type="checkbox"/> |                                    |
|    | Africa      | <input type="checkbox"/> |                                    |
|    | Oceania     | <input type="checkbox"/> |                                    |
|    | Middle-East | <input type="checkbox"/> |                                    |
|    | Others      | <input type="checkbox"/> |                                    |

|       |              |                                                                    |                      |
|-------|--------------|--------------------------------------------------------------------|----------------------|
| 학적 상태 | SNU 정규학부생    | <input type="checkbox"/>                                           | <input type="text"/> |
|       | SNU 교환학생     | 국내교환학생 <input type="checkbox"/><br>국제교환학생 <input type="checkbox"/> |                      |
|       | SNU 국제 정규학부생 | <input type="checkbox"/>                                           |                      |
|       | 기타           | <input type="checkbox"/>                                           |                      |
|       | 대학원생         | 석사과정 <input type="checkbox"/><br>박사과정 <input type="checkbox"/>     |                      |

|         |                      |    |                      |
|---------|----------------------|----|----------------------|
| 소속 단과대학 | <input type="text"/> | 전공 | <input type="text"/> |
|---------|----------------------|----|----------------------|

2015년 대한민국에서 발생한 메르스 감염과 관련하여 본인이 생각하는 연관 키워드를 3개 이상 입력해 주십시오.

예) 질병, 감염, 병원, 전염병, 마스크

|  |  |  |  |
|--|--|--|--|
|  |  |  |  |
|--|--|--|--|

## MERS 지식 문항

설명 : 다음은 MERS 에 대한 지식수준을 묻는 문항들입니다. 평소의 지식을 묻는 의도이므로 점수를 부여하지 않습니다. 인터넷 검색이나 참고자료를 참조하지 않을 것을 권장합니다.

각 문항의 선택지에 해당되는 부분에 √로 표시해주시시오.

### 1. MERS에 대한 본인의 지식 수준이 어느 정도라고 생각하십니까?

- ① 매우 낮은 수준이다.
- ② 낮은 수준이다.
- ③ 보통이다.
- ④ 높은 수준이다.
- ⑤ 매우 높은 수준이다.

### 2. MERS의 개념에 대한 설명으로 옳은 것은?

- 코로나바이러스 감염에 의한 호흡기 질병이다.
- 주로 발열을 동반한 호흡기 증상으로 나타나며, 전염성 질병이 아니다.
- 중증으로 진행될 수는 있으나, 사망에 이르지 않는다.
- 잘 모르겠다.

### 3. MERS의 전파 경로에 대한 설명으로 옳은 것은?

- 명확한 감염 경로가 밝혀져 있다.
- 사람간 밀접 접촉에 의해 전파된다.
- 잘못된 음식을 먹어서 걸릴 수도 있다.
- 잘 모르겠다.

**4. MERS의 “밀접 접촉”에 대한 설명으로 옳지 않은 것은?**

- 환자의 호흡기 분비물과 직접 접촉하면 해당된다.
- 같은 방 또는 진료/처치/병실에 머문 경우 해당된다.
- 가족과 보건의료인 등은 밀접접촉자에서 제외된다.
- 잘 모르겠다.

**5. MERS의 증상에 대한 설명으로 옳은 것은?**

- 주 증상은 고열, 기침, 호흡곤란이다.
- 기저질환과 큰 관련이 없다.
- 증상이 없는 경우는 없다.
- 잘 모르겠다.

**6. MERS의 잠복기에 대한 설명으로 옳은 것은?**

- MERS는 잠복기 없이 증상이 바로 나타난다.
- 잠복기에는 증상이 나타나지 않으나, 전염될 수 있다.
- 잠복기는 최소 2일에서 14일 사이이며 평균 5일이다.
- 잘 모르겠다.

**7. MERS의 특성에 대한 설명으로 옳지 않은 것은?**

- 노약자, 임신부나 어린이가 메르스에 더 잘 걸린다는 과학적 증거는 없다.
- 메르스 감염은 다른 질환을 갖고 있는 50대 이상의 여자가 가장 많이 걸리는 것으로 알려져 있다.
- 지역사회에서의 전파에 대한 근거는 현재로서는 없다.
- 잘 모르겠다.

**8. MERS의 정부 권고 자가격리에 대한 설명으로 옳지 않은 것은?**

- 자가격리란 자택에서 생활하면서 외부 출입을 제한하는 것을 말한다.
- 메르스 환자와 밀접한 접촉을 한 경우, 평균 잠복 기간(접촉일로부터 5일)동안 자가 격리를 해야 한다.
- 메르스 환자가 격리를 거부하면 '감염병의 예방 및 관리에 관한 법률'에 따라 벌금이 부과된다.
- 잘 모르겠다.

**9. MERS의 치료법과 백신에 대한 설명으로 옳은 것은?**

- MERS에 대한 확실한 치료법이 있다.
- 현재로서는, MERS에 대한 확실한 치료법도 백신도 없다.
- 현재로서는, MERS에 대한 확실한 치료법은 없으나, 예방 백신은 있다.
- 잘 모르겠다.

**MERS 위험인식 문항**

설명 : 아래의 각 문항과 동의하는 정도에 따라 체크해주시기 바랍니다.

|   |                                                   | 전혀 그렇지 않다 | 그렇지 않다 | 보통이다 | 그렇다 | 매우 그렇다 |
|---|---------------------------------------------------|-----------|--------|------|-----|--------|
| 1 | 나는 MERS 환자와 접촉하면 내가 MERS 에 걸릴 것이라고 생각한다.          | 1         | 2      | 3    | 4   | 5      |
| 2 | 나는 MERS 환자와 접촉하지 않아도 내가 MERS 에 걸릴 수 있을 것이라고 생각한다. | 1         | 2      | 3    | 4   | 5      |
| 3 | 나는 MERS 에 걸리면 건강상 심각한 피해를 입을 것이다.                 | 1         | 2      | 3    | 4   | 5      |
| 4 | 나는 MERS 가 어떤 호흡기질환보다 심각하다고 생각한다.                  | 1         | 2      | 3    | 4   | 5      |
| 5 | 다른 병에 걸려도 MERS 로 인해 병원에 가지 않을 것이다.                | 1         | 2      | 3    | 4   | 5      |
| 6 | MERS 는 나의 지역사회에 심각한 피해를 끼칠 것이다.                   | 1         | 2      | 3    | 4   | 5      |
| 7 | 우리나라에서 MERS 는 앞으로 또 유행할 수 있을 것이다.                 | 1         | 2      | 3    | 4   | 5      |

## MERS 예방행동 문항

설명 : 다음에 제시하는 예방행동 중 귀하가 MERS 를 예방하기 위해 실천했던 행동에 대해 답해 주십시오.

1. 될 수 있으면 집을 떠나지 않았다.  
 예                       아니오
2. 외출 전/후 손을 물과 비누로 씻었다.  
 예                       아니오
3. 씻지 않은 손으로 눈, 코, 입을 만지지 않았다.  
 예                       아니오
4. 발열이나 호흡기 증상이 있는 사람과 접촉을 피했다.  
 예                       아니오
5. 외출 시 손 세정제로 손을 소독했다.  
 예                       아니오
6. 외출 시 마스크를 착용했다.  
 예                       아니오
7. 사람이 많이 모이는 곳을 피했다.  
 예                       아니오
8. 병원에 가는 빈도수를 줄였다.  
 예                       아니오
9. 대중교통 이용을 하지 않았다.  
 예                       아니오
10. 면역력을 증가시키는 음식을 먹었다.  
 예                       아니오
11. 면역력을 증가시키기 위해 운동을 했다.  
 예                       아니오

## MERS 정책 및 사회에 대한 신뢰도 문항

본 설문 문항들은 2012 년도에 실시된 한국종합사회조사 (KGSS)를 바탕으로 만들어졌습니다.

총 120 문항으로 이루어진 설문지 가운데서 우리의 연구 방법에 쓰일 수 있는 측정 문항들을 채택해 보았습니다.

채택된 문항들: #4, #16, #17

**설명 : 각 문항의 선택지에 해당되는 부분에 √로 표시해주시시오.**

1. 당신은 다음 기관들을 이끄는 사람들을 어느 정도 신뢰하는지 말씀해주시시오.

①: 매우 신뢰하지 않는다 ②: 약간 신뢰하지 않는다 ③: 보통이다 ④: 약간 신뢰한다 ⑤: 매우

신뢰한다

|             |  |  |  |  |  |
|-------------|--|--|--|--|--|
| 1) 신문사      |  |  |  |  |  |
| 2) TV 방송국   |  |  |  |  |  |
| 3) 의료계      |  |  |  |  |  |
| 4) 중앙 정부 부처 |  |  |  |  |  |
| 5) 지방 자치 정부 |  |  |  |  |  |
| 6) 국회       |  |  |  |  |  |
| 7) 청와대      |  |  |  |  |  |
| 8) 시민 운동 단체 |  |  |  |  |  |

2. 귀하는 우리 사회가 어느 정도 믿을 수 있는 사회라고 생각하십니까?

- ① 매우 믿을 수 없다.
- ② 다소 믿을 수 없다.
- ③ 보통이다.
- ④ 다소 믿을 수 있다.
- ⑤ 매우 믿을 수 있다.

3. 귀하는 한국의 전반적인 보건 정책들에 대해 어느 정도 알고 계십니까?

- ① 전혀 모른다.
- ② 잘 모른다.
- ③ 보통이다.
- ④ 조금 알고 있다
- ⑤ 잘 알고 있다.
- ⑥

4. 귀하는 한국의 보건 정책들에 대해 어느 정도 신뢰하십니까?

- ① 매우 신뢰하지 않는다
- ② 약간 신뢰하지 않는다.
- ③ 보통이다.
- ④ 약간 신뢰한다
- ⑤ 매우 신뢰한다.

5. 귀하는 앞으로 한국의 보건관련 정책들이 어느 정도 좋아지거나 또는 나빠질 것이라고 생각하십니까?

- ① 훨씬 나빠질 것이다.
- ② 다소 나빠질 것이다.
- ③ 보통이다.
- ④ 다소 좋아질 것이다.



⑤ 훨씬 좋아질 것이다.

**MERS 특수가정 문항**

**설명 : 각 문항의 선택지에 해당되는 부분에 √로 표시해주시시오.**

1. 귀하는 대체로 스스로 타인을 도우려 한다고 생각하십니까?  
① 매우 그렇다 ② 그렇다 ③ 그렇지 않다 ④ 매우 그렇지 않다
  
2. 국가 재난이나 위기가 닥쳤을 때 귀하는 남을 위해 희생할 수 있다고 생각하십니까?  
① 매우 그렇다 ② 그렇다 ③ 그렇지 않다 ④ 매우 그렇지 않다
  
3. 지자체별로 MERS 감염자의 경로를 알리고 병원명을 공개하는 등의 방법으로 시민 스스로 MERS 위험에 노출되었다고 예상하는 경우 자가신고를 할 수 있도록 유도하고 있습니다. 아래와 같이 ①번부터 순서대로 감염위험이 낮아진다고 알려진 상황을 가정했을 때 어떠한 상황에서 자가신고를 하겠습니까?  
① 감염자와 밀접접촉을 한 경우  
② 감염자와 대화를 나누거나 감염자가 생겨난 응급실에 비공식적으로 다녀간 경우 (①의 경우 포함)  
③ 감염자와 같은 실내에 머무르거나 혹은 같은 대중교통을 탄 것으로 예상되는 경우 (①,②의 경우 포함)  
④ 감염자와 실외에서 마주친 것으로 예상되는 경우 (위의 모든 경우 포함)

**다음은 이번엔 한국에서 발생한 MERS 사태에 대해 주어진 상황에 대한 질문입니다.**

**(실제 발생한 상황이 아니며 가정된 상황에서 귀하의 생각과 일치하는 선택지를 고르십시오.)**

4. 귀하가 MERS 의심환자로 판정되어 자가격리를 권고 받았다면 이에 어떻게 반응하시겠습니까? (공공장소 출입금지, 대중교통 이용금지, 해외출국금지 등 포함)  
① 협조적으로 응하며 개인적인 일보다 우선시한다.  
(4-1 번으로 가십시오)  
② 협조는 하지만 개인적인 일을 우선시한다.  
(4-2 번으로 가십시오)
  
- 4-1. 무슨 이유에서 자가격리 협조를 개인적인 일보다 우선시 하시겠습니까?  
① 나로 인해 남이 피해를 받는 게 싫어서  
② 전염병 확산을 막기 위해서  
③ 나보다는 남이 중요해서

④ 기타 ( )

4-2. 무슨 이유에서 자가격리 협조보다 개인적인 일을 우선시 하시겠습니까?

① 남으로 인해 내가 피해를 받는 게 싫어서

② 전염병 확산에 관심이 없어서

③ 남보다는 내가 중요해서

④ 기타 ( )

5. 귀하는 응급상황 혹은 위기상황이 발생했을 때 어떤 반응을 보이는 편입니까?

① 과도한 반응을 보인다 ② 최소한의 대처만 한다 ③ 신경을 쓰지 않는다 ④ 모르겠다

6. 귀하의 주변에 MERS 의심환자 혹은 확진환자로 판정된 사람의 자녀가 귀하의 지인 또는 귀하 가족의 자녀와 같은 반에서 수업을 듣는다는 사실을 알았다면 이에 어떻게 반응하시겠습니까?

(학교, 학원 등 포함)

① 귀하의 지인 또는 귀하 가족의 자녀의 등교(등원)를 자제하도록 한다.

(6-1 번으로 가십시오)

② 평소대로 귀하의 지인 또는 귀하 가족의 자녀가 등교(등원)를 할 수 있도록 한다

(6-2 번으로 가십시오)

6-1. (등교(등원)을 자제하도록 한다면) 무슨 이유에서 자제하도록 하시겠습니까?

① 나의 지인 또는 나의 가족의 자녀에게 피해가 갈 염려 때문에

② 이로 인해 내가 피해를 입을 염려 때문에

③ 이로 인해 대중에 전염병이 확산될 염려 때문에

④ 기타 ( )

6-2. (평소대로 등교(등원)을 할 수 있도록 한다면) 무슨 이유에서 허용하시겠습니까?

① 의심(확진)환자의 자녀는 나의 지인 혹은 주변 사람에 대해 위험대상이 아니기 때문에

② 나의 지인 또는 나의 가족의 자녀의 교육에 대한 기회가 줄어들까봐

③ 이로 인해 대중에 전염병이 확산되지 않을 것이라 생각하기 때문에

④ 기타 ( )

7. 귀하의 주변에 MERS 발생 병원 의료진의 자녀가 귀하의 지인 또는 귀하 가족의 자녀와 같은 반에서 수업을 듣는다는 사실을 알았다면 이에 어떻게 생각하시겠습니까?

(학교, 학원 등 포함)

① MERS 발생 병원 의료진의 자녀는 등교(등원)를 하면 안 된다고 생각한다.

(7-1 번으로 가십시오)

② MERS 발생 병원 의료진의 자녀도 평소대로 등교(등원)를 할 수 있다고 생각한다.

(7-2 번으로 가십시오)

7-1. (등교(등원)를 하면 안 된다고 생각하신다면) 무슨 이유에서 안 된다고 생각하십니까?

- ① 나의 자녀에게 피해가 갈 염려 때문에
- ② 주변 사람들에게 피해가 갈 염려 때문에
- ③ 이로 인해 대중에 전염병이 확산될 염려 때문에
- ④ 기타 ( )

7-2. (평소대로 등교(등원)를 할 수 있다고 생각하신다면) 무슨 이유에서 된다고 생각하십니까?

- ① MERS 발생 병원 의료진의 자녀는 나의 자녀 혹은 주변 사람에 대해 위험대상이 아니기 때문에
- ② MERS 발생 병원 의료진의 자녀의 교육불평등에 대한 우려 때문에
- ③ 이로 인해 대중에 전염병이 확산되지 않을 것이라 생각하기 때문에
- ④ 기타 ( )

**사회경제적 정보**

설명 : 각 문항의 선택지에 해당되는 부분에 √로 표시해주시시오. 에는 자세한 세부사항에 대해 적어주시시오.

|                                  |               |                          |             |                          |                          |
|----------------------------------|---------------|--------------------------|-------------|--------------------------|--------------------------|
| <b>가정의<br/>경제적 상태<br/>(월 수입)</b> | 100 만원 미만     | <input type="checkbox"/> | <b>주거형태</b> | 아파트                      | <input type="checkbox"/> |
|                                  | 100-200 만원 미만 | <input type="checkbox"/> |             | 단독주택                     | <input type="checkbox"/> |
|                                  | 200-300 만원 미만 | <input type="checkbox"/> |             | 다세대주택                    | <input type="checkbox"/> |
|                                  | 300-400 만원 미만 | <input type="checkbox"/> |             | 고시원(텔)                   | <input type="checkbox"/> |
|                                  | 400-500 만원 미만 | <input type="checkbox"/> |             | 원룸                       | <input type="checkbox"/> |
|                                  | 500 만원 이상     | <input type="checkbox"/> |             | 하숙                       | <input type="checkbox"/> |
|                                  |               |                          | 기숙사         | <input type="checkbox"/> |                          |
|                                  |               |                          | 기타          | <input type="text"/>     |                          |

설문에 응답해주셔서 감사합니다.
